# Supplementary material for: [Retracted] Genome Assembly and Analyses of the Macrofungus Macrocybe gigantea
Source: Hindawi journal article supplement (doi:10.1155/2021/6656365), 2021-01-01
Supplement: f3 [file 6656365.f3.pdf]

**Table S1. The library information and data statistics**

| <b>Platform</b> | <b>Number of libraries</b> | <b>Size</b>              | <b>Average Read Length (bp)</b> | <b>Total Bases (Gb)</b> | <b>Sequence Depth</b> | <b>Application</b>     |
|-----------------|----------------------------|--------------------------|---------------------------------|-------------------------|-----------------------|------------------------|
| <b>PacBio</b>   | <b>RS II and Sequel</b>    | <b>Library Mean Size</b> | <b>7,707</b>                    | <b>8.753</b>            | <b>213 ×</b>          | <b>Genome assembly</b> |
|                 | Sequel                     | 20 Kb                    | 7,717                           | 1.396                   |                       |                        |
|                 | RS II                      | 20 Kb                    | 7,705                           | 7.357                   |                       |                        |
