# Supplementary material for: [Retracted] Genome Assembly and Analyses of the Macrofungus Macrocybe gigantea
Source: Hindawi journal article supplement (doi:10.1155/2021/6656365), 2021-01-01
Supplement: f4 [file 6656365.f4.pdf]

**Table S2. The statistics of the fungal genomes used in this paper**

| S.No | Organism Name                        | Name       | INSDC          | Size (Mb) | GC%   | Short Name              | Short Name(JGI)  | Type | Family                  | Order             | Genome_Source |
|------|--------------------------------------|------------|----------------|-----------|-------|-------------------------|------------------|------|-------------------------|-------------------|---------------|
| 1    | <i>Macrocybe gigangea</i>            | —          | —              | 41.23     | 49.82 | <i>M. gigangea</i>      | <i>Macgig</i>    | SN   | <i>Tricholomataceae</i> | <i>Agaricales</i> | —             |
| 2    | <i>Armillaria ostoyae C18/9</i>      | master WGS | FUEG00000000.1 | 60.11     | 0     | <i>A. ostoyae</i>       | <i>Armost1</i>   | WR   | <i>Physalacriaceae</i>  | <i>Agaricales</i> | JGI           |
| 3    | <i>Pleurotus eryngii</i>             | master WGS | QCWS00000000.1 | 49.92     | 49.4  | <i>P. eryngii</i>       | <i>Pleery1</i>   | WD   | <i>Pleurotaceae</i>     | <i>Agaricales</i> | JGI           |
| 4    | <i>Coprinopsis cinerea</i>           | master WGS | AACS00000000.2 | 36.19     | 51.6  | <i>C. cinerea</i>       | <i>Copci1</i>    | LD   | <i>Psathyrellaceae</i>  | <i>Agaricales</i> | JGI           |
| 5    | <i>Clitocybe gibba</i>               | —          | —              | —         | —     | <i>C. gibba</i>         | <i>Cligib1</i>   | SN   | <i>Tricholomataceae</i> | <i>Agaricales</i> | JGI           |
| 6    | <i>Lepista nuda</i>                  | master WGS | —              | 44.13     | —     | <i>L. nuda</i>          | <i>Lepnud1</i>   | WR   | <i>Tricholomataceae</i> | <i>Agaricales</i> | JGI           |
| 7    | <i>Tricholoma matsutake 945 v3.0</i> | master WGS | PKSN00000000.2 | 189       | 34.4  | <i>T. matsutake</i>     | <i>Trima3</i>    | ECM  | <i>Tricholomataceae</i> | <i>Agaricales</i> | NCBI          |
| 8    | <i>Tricholoma saponaceum</i>         | master WGS | QLOJ00000000.1 | 55.71     | 46.7  | <i>T. saponaceum</i>    | <i>Trisap</i>    | ECM  | <i>Tricholomataceae</i> | <i>Agaricales</i> | NCBI          |
| 9    | <i>Tricholoma sp. MG77</i>           | master WGS | QMF00000000.1  | 118.32    | 45.5  | <i>T. sp. MG77</i>      | <i>TrispMG77</i> | ECM  | <i>Tricholomataceae</i> | <i>Agaricales</i> | NCBI          |
| 10   | <i>Tricholoma terreum</i>            | master WGS | QFEU00000000.1 | 84.41     | —     | <i>T. terreum</i>       | <i>Triter</i>    | ECM  | <i>Tricholomataceae</i> | <i>Agaricales</i> | NCBI          |
| 11   | <i>Tricholoma flavovirens</i>        | master WGS | QLOK00000000.1 | 119.32    | 44.3  | <i>T. flavovirens</i>   | <i>Trifla</i>    | ECM  | <i>Tricholomataceae</i> | <i>Agaricales</i> | NCBI          |
| 12   | <i>Tricholoma bakamatsutake</i>      | master WGS | QLOL00000000.1 | 140.67    | 43.2  | <i>T. bakamatsutake</i> | <i>Tribak</i>    | ECM  | <i>Tricholomataceae</i> | <i>Agaricales</i> | NCBI          |
| 13   | <i>Tricholoma sp. MG99</i>           | master WGS | QOVE00000000.1 | 59.53     | —     | <i>T. sp. MG99</i>      | —                | —    | <i>Tricholomataceae</i> | <i>Agaricales</i> | —             |

WR: wood-rotting, ECM:ectomycorrhizal, LD:litter decomposer, WD:wood-decay, SN:Saprotrophic nutrition

\*All statistics come from with NCBI and JGI
