# Supplementary material for: [Retracted] Genome Assembly and Analyses of the Macrofungus Macrocybe gigantea
Source: Hindawi journal article supplement (doi:10.1155/2021/6656365), 2021-01-01
Supplement: f10 [file 6656365.f10.pdf]

**Supplemental Table 8. Information used for the species originally screened**

| <i>NO.</i> | Accession on Genbank | Genus                  | Species                 |
|------------|----------------------|------------------------|-------------------------|
| 1          | AB499079.1           | <i>Oudemansiella</i>   | <i>venosolamellata</i>  |
| 2          | AB512313.1           | <i>Mycena</i>          | <i>luteopallens</i>     |
| 3          | AB519182.1           | <i>Phlebia</i>         | <i>brevispora</i>       |
| 4          | AB688115.1           | <i>Mucidula</i>        | <i>brunneomarginata</i> |
| 5          | AB688118.1           | <i>Mucidula</i>        | <i>mucida</i>           |
| 6          | AB859204.1           | <i>Agaricales</i>      | <i>sp.</i>              |
| 7          | AF019636.1           | <i>Piriformospora</i>  | <i>indica</i>           |
| 8          | AF031181.1           | <i>Lentinula</i>       | <i>lateritia</i>        |
| 9          | AF291273.1           | <i>Exidia</i>          | <i>glandulosa</i>       |
| 10         | AF363771.1           | <i>Pycnoporus</i>      | <i>sanguineus</i>       |
| 11         | AF377067.1           | <i>Gautieria</i>       | <i>morchelliformis</i>  |
| 12         | AF476965.1           | <i>Ectomycorrhizal</i> | <i>root</i>             |
| 13         | AF515577.1           | <i>Fomitiporia</i>     | <i>mediterranea</i>     |
| 14         | AF518757.1           | <i>Polyporus</i>       | <i>gayanus</i>          |
| 15         | AJ344109.1           | <i>Coniophora</i>      | <i>puteana</i>          |
| 16         | AJ419217.1           | <i>Suillus</i>         | <i>cothurnatus</i>      |
| 17         | AJ420949.1           | <i>Gloeophyllum</i>    | <i>trabeum</i>          |
| 18         | AJ810035.1           | <i>Rhizopogon</i>      | <i>vinicolor</i>        |
| 19         | AM747526.1           | <i>Coniophora</i>      | <i>olivacea</i>         |
| 20         | AY016440.1           | <i>Lentinula</i>       | <i>boryana</i>          |
| 21         | AY026918.1           | <i>Xerula</i>          | <i>furfuracea</i>       |
| 22         | AY194519.1           | <i>Bolbitius</i>       | <i>vitellinus</i>       |
| 23         | AY194536.1           | <i>Agrocybe</i>        | <i>semiorbicularis</i>  |
| 24         | AY213555.1           | <i>Armillaria</i>      | <i>gemina</i>           |
| 25         | AY213565.1           | <i>Armillaria</i>      | <i>sinapina</i>         |
| 26         | AY213590.1           | <i>Armillaria</i>      | <i>tabescens</i>        |
| 27         | AY216470.1           | <i>Crinipellis</i>     | <i>perniciosa</i>       |
| 28         | AY219344.1           | <i>Phanerochaete</i>   | <i>chryso sporium</i>   |
| 29         | AY228342.1           | <i>Armillaria</i>      | <i>cf.</i>              |
| 30         | AY243597.1           | <i>Macrolepiota</i>    | <i>fuliginosa</i>       |
| 31         | AY256692.1           | <i>Gymnopus</i>        | <i>dryophilus</i>       |
| 32         | AY263434.1           | <i>Gymnopus</i>        | <i>brunneigracilis</i>  |
| 33         | AY265837.1           | <i>Pleurotus</i>       | <i>lampas</i>           |
| 34         | AY281008.1           | <i>Gymnopilus</i>      | <i>spectabilis</i>      |
| 35         | AY313275.1           | <i>Omphalotus</i>      | <i>nidiformis</i>       |
| 36         | AY313278.1           | <i>Omphalotus</i>      | <i>olearius</i>         |
| 37         | AY313281.1           | <i>Omphalotus</i>      | <i>olivascens</i>       |
| 38         | AY313284.1           | <i>Omphalotus</i>      | <i>cf.</i>              |
| 39         | AY325842.1           | <i>Amanita</i>         | <i>thiersii</i>         |
| 40         | AY386831.1           | <i>Gymnopilus</i>      | <i>junonius</i>         |
| 41         | AY436425.1           | <i>Oudemansiella</i>   | <i>mucida</i>           |
| 42         | AY484515.1           | <i>Tricholoma</i>      | <i>bakamatsutake</i>    |
| 43         | AY513228.1           | <i>Lentinellus</i>     | <i>vulpinus</i>         |
| 44         | AY627835.1           | <i>Epacris</i>         | <i>pulchella</i>        |
| 45         | AY642815.1           | <i>Leucoagaricus</i>   | <i>gongylophorus</i>    |
| 46         | AY665187.1           | <i>Oudemansiella</i>   | <i>radicata</i>         |

|    |            |                          |                         |
|----|------------|--------------------------|-------------------------|
| 47 | AY683190.1 | <i>Lentinula</i>         | <i>edodes</i>           |
| 48 | AY787665.1 | <i>Armillaria</i>        | <i>cepistipes</i>       |
| 49 | AY804293.1 | <i>Oudemansiella</i>     | <i>submucida</i>        |
| 50 | AY996680.1 | <i>Armillaria</i>        | <i>ostoyae</i>          |
| 51 | DQ179118.1 | <i>Amanita</i>           | <i>muscaria</i>         |
| 52 | DQ179122.1 | <i>Laccaria</i>          | <i>bicolor</i>          |
| 53 | DQ267124.1 | <i>Botryobasidium</i>    | <i>botryosum</i>        |
| 54 | DQ320133.1 | <i>Phlebiopsis</i>       | <i>gigantea</i>         |
| 55 | DQ320135.1 | <i>Phlebia</i>           | <i>centrifuga</i>       |
| 56 | DQ384585.1 | <i>Mycena</i>            | <i>aurantiidisca</i>    |
| 57 | DQ397949.1 | <i>Boletus</i>           | <i>edulis</i>           |
| 58 | DQ398098.1 | <i>Uncultured</i>        | <i>fungus</i>           |
| 59 | DQ444312.1 | <i>Marasmius</i>         | <i>androsaceus</i>      |
| 60 | DQ449970.1 | <i>Gymnopus</i>          | <i>ocior</i>            |
| 61 | DQ449972.1 | <i>Gymnopus</i>          | <i>subsulphureus</i>    |
| 62 | DQ449973.1 | <i>Gymnopus</i>          | <i>exculptus</i>        |
| 63 | DQ449974.1 | <i>Gymnopus</i>          | <i>dryophilus</i>       |
| 64 | DQ449975.1 | <i>Gymnopus</i>          | <i>dryophilus</i>       |
| 65 | DQ449980.1 | <i>Gymnopus</i>          | <i>hybridus</i>         |
| 66 | DQ450876.1 | <i>Laetiporus</i>        | <i>sulphureus</i>       |
| 67 | DQ463357.1 | <i>Crucibulum</i>        | <i>laeve</i>            |
| 68 | DQ480101.1 | <i>Gymnopus</i>          | <i>alpinus</i>          |
| 69 | DQ480114.1 | <i>Gymnopus</i>          | <i>alpinus</i>          |
| 70 | DQ490645.1 | <i>Mycena</i>            | <i>amicta</i>           |
| 71 | DQ493749.1 | <i>Fibulorhizoctonia</i> | <i>sp.</i>              |
| 72 | DQ494686.1 | <i>Plicaturopsis</i>     | <i>crispa</i>           |
| 73 | DQ822822.1 | <i>Rhizopogon</i>        | <i>salebrosus</i>       |
| 74 | DQ822834.1 | <i>Tricholoma</i>        | <i>flavovirens</i>      |
| 75 | EF493298.1 | <i>Lactarius</i>         | <i>quietus</i>          |
| 76 | EU078733.1 | <i>Paxillus</i>          | <i>involutus</i>        |
| 77 | EU346883.1 | <i>Piloderma</i>         | <i>croceum</i>          |
| 78 | EU598181.1 | <i>Russula</i>           | <i>vinacea</i>          |
| 79 | EU622257.1 | <i>Lycoperdon</i>        | <i>perlatum</i>         |
| 80 | EU653301.1 | <i>Tricholoma</i>        | <i>terreum</i>          |
| 81 | EU669224.1 | <i>Mycena</i>            | <i>tenax</i>            |
| 82 | EU696849.1 | <i>Thelephora</i>        | <i>ganbajun</i>         |
| 83 | EU784195.1 | <i>Cyathus</i>           | <i>striatus</i>         |
| 84 | EU819476.1 | <i>Laccaria</i>          | <i>amethystina</i>      |
| 85 | FJ168568.1 | <i>Coprinellus</i>       | <i>micaceus</i>         |
| 86 | FJ234206.1 | <i>Pycnoporus</i>        | <i>cinnabarinus</i>     |
| 87 | FJ235157.1 | <i>Bolbitius</i>         | <i>cf.</i>              |
| 88 | FJ372685.1 | <i>Pycnoporus</i>        | <i>puniceus</i>         |
| 89 | FJ475747.1 | <i>Uncultured</i>        | <i>Tricholomataceae</i> |
| 90 | FJ596884.1 | <i>Mycena</i>            | <i>epipterygia</i>      |
| 91 | FJ608588.1 | <i>Fomitopsis</i>        | <i>pinicola</i>         |
| 92 | FJ644284.1 | <i>Fibroporia</i>        | <i>radiculosa</i>       |
| 93 | FJ775544.1 | <i>Porodaedalea</i>      | <i>chrysoloma</i>       |
| 94 | FJ904732.1 | <i>Pleurotus</i>         | <i>eryngii</i>          |

|     |            |                      |                        |
|-----|------------|----------------------|------------------------|
| 95  | FM872468.1 | <i>Antrodia</i>      | <i>serialis</i>        |
| 96  | FM878021.1 | <i>Psathyrella</i>   | <i>marcescibilis</i>   |
| 97  | GQ159817.1 | <i>Cortinarius</i>   | <i>glaucopus</i>       |
| 98  | GQ249277.1 | <i>Coprinopsis</i>   | <i>sclerotiger</i>     |
| 99  | GQ913353.1 | <i>Hymenopellis</i>  | <i>sinapicolor</i>     |
| 100 | GQ913394.1 | <i>Hymenopellis</i>  | <i>rugosoceps</i>      |
| 101 | GQ913397.1 | <i>Hymenopellis</i>  | <i>orientalis</i>      |
| 102 | GQ913399.1 | <i>Hymenopellis</i>  | <i>sp.</i>             |
| 103 | GU001952.1 | <i>Lentinula</i>     | <i>edodes</i>          |
| 104 | GU187508.1 | <i>Anomoporia</i>    | <i>bombycina</i>       |
| 105 | GU187523.1 | <i>Hydnomerulius</i> | <i>pinastri</i>        |
| 106 | GU207257.1 | <i>Lentinus</i>      | <i>tigrinus</i>        |
| 107 | GU234138.1 | <i>Mycena</i>        | <i>simia</i>           |
| 108 | GU234146.1 | <i>Mycena</i>        | <i>cinerella</i>       |
| 109 | GU327634.1 | <i>Coprinopsis</i>   | <i>cinerea</i>         |
| 110 | GU731553.1 | <i>Fomitopsis</i>    | <i>rosea</i>           |
| 111 | HM131826.1 | <i>Guyanagaster</i>  | <i>necrorhiza</i>      |
| 112 | HM190111.1 | <i>Basidiomycota</i> | <i>sp.</i>             |
| 113 | HM190112.1 | <i>Basidiomycota</i> | <i>sp.</i>             |
| 114 | HM240535.1 | <i>Mycena</i>        | <i>pura</i>            |
| 115 | HM561977.1 | <i>Agaricus</i>      | <i>bisporus</i>        |
| 116 | HQ324997.1 | <i>Omphalotus</i>    | <i>sp.</i>             |
| 117 | HQ385850.1 | <i>Rhizopogon</i>    | <i>vesiculosus</i>     |
| 118 | HQ385851.1 | <i>Rhizopogon</i>    | <i>vesiculosus</i>     |
| 119 | HQ400708.1 | <i>Rigidoporus</i>   | <i>microporus</i>      |
| 120 | HQ439363.1 | <i>Polyporus</i>     | <i>squamosus</i>       |
| 121 | HQ441577.1 | <i>Oliveonia</i>     | <i>pauxilla</i>        |
| 122 | HQ604769.1 | <i>Mycena</i>        | <i>sp.</i>             |
| 123 | HQ659234.1 | <i>Obba</i>          | <i>rivulosa</i>        |
| 124 | JF300841.1 | <i>Uncultured</i>    | <i>fungus</i>          |
| 125 | JF692737.1 | <i>Hypholoma</i>     | <i>sublateritium</i>   |
| 126 | JF907778.1 | <i>Armillaria</i>    | <i>gallica</i>         |
| 127 | JF908372.1 | <i>Mycena</i>        | <i>rhamnicola</i>      |
| 128 | JF908374.1 | <i>Mycena</i>        | <i>belliae</i>         |
| 129 | JF908385.1 | <i>Mycena</i>        | <i>cyanorhiza</i>      |
| 130 | JF908386.1 | <i>Mycena</i>        | <i>pseudocorticola</i> |
| 131 | JF908388.1 | <i>Mycena</i>        | <i>supina</i>          |
| 132 | JF908390.1 | <i>Mycena</i>        | <i>vitis</i>           |
| 133 | JF908393.1 | <i>Mycena</i>        | <i>strobilinoidea</i>  |
| 134 | JF908402.1 | <i>Mycena</i>        | <i>arcangeliana</i>    |
| 135 | JF908410.1 | <i>Mycena</i>        | <i>filopes</i>         |
| 136 | JF908412.1 | <i>Mycena</i>        | <i>metata</i>          |
| 137 | JF908425.1 | <i>Mycena</i>        | <i>algeriensis</i>     |
| 138 | JF908426.1 | <i>Mycena</i>        | <i>alnetorum</i>       |
| 139 | JF908429.1 | <i>Mycena</i>        | <i>meliigena</i>       |
| 140 | JF908433.1 | <i>Mycena</i>        | <i>polygramma</i>      |
| 141 | JF908435.1 | <i>Mycena</i>        | <i>vulgaris</i>        |
| 142 | JF908436.1 | <i>Mycena</i>        | <i>flavoalba</i>       |

|     |            |                         |                          |
|-----|------------|-------------------------|--------------------------|
| 143 | JF908443.1 | <i>Mycena</i>           | <i>capillaris</i>        |
| 144 | JF908446.1 | <i>Mycena</i>           | <i>xantholeuca</i>       |
| 145 | JF908467.1 | <i>Mycena</i>           | <i>clavicularis</i>      |
| 146 | JF908471.1 | <i>Mycena</i>           | <i>rosella</i>           |
| 147 | JF908472.1 | <i>Mycena</i>           | <i>pura</i>              |
| 148 | JF908473.1 | <i>Mycena</i>           | <i>rosella</i>           |
| 149 | JF908477.1 | <i>Mycena</i>           | <i>rebaudengoi</i>       |
| 150 | JF908478.1 | <i>Mycena</i>           | <i>juniperina</i>        |
| 151 | JF908485.1 | <i>Mycena</i>           | <i>latifolia</i>         |
| 152 | JF908486.1 | <i>Mycena</i>           | <i>cicognanii</i>        |
| 153 | JF908488.1 | <i>Mycena</i>           | <i>rosella</i>           |
| 154 | JF908492.1 | <i>Mycena</i>           | <i>crocata</i>           |
| 155 | JF908786.1 | <i>Gyrodon</i>          | <i>lividus</i>           |
| 156 | JN020976.1 | <i>Xerocomus</i>        | <i>badius</i>            |
| 157 | JN164915.1 | <i>Trametes</i>         | <i>betulina</i>          |
| 158 | JN182207.1 | <i>Mycena</i>           | <i>sp.</i>               |
| 159 | JN645075.1 | <i>Trametes</i>         | <i>cingulata</i>         |
| 160 | JN661713.1 | <i>Paxillus</i>         | <i>ammoniaevirescens</i> |
| 161 | JN684801.1 | <i>Agrocybe</i>         | <i>pediades</i>          |
| 162 | JN704645.1 | <i>Serpula</i>          | <i>lacrymans</i>         |
| 163 | JQ711905.1 | <i>Suillus</i>          | <i>tomentosus</i>        |
| 164 | JQ751210.1 | <i>Hebeloma</i>         | <i>cylindrosporium</i>   |
| 165 | JQ753953.1 | <i>Lactarius</i>        | <i>volemus</i>           |
| 166 | JQ780407.1 | <i>Dichomitus</i>       | <i>squalens</i>          |
| 167 | JX030205.1 | <i>Scleroderma</i>      | <i>citrinum</i>          |
| 168 | JX068526.1 | <i>Tricholoma</i>       | <i>giganteum</i>         |
| 169 | JX129179.1 | <i>Cylindrobasidium</i> | <i>sp.</i>               |
| 170 | JX504115.1 | <i>Laccaria</i>         | <i>bicolor</i>           |
| 171 | JX536169.1 | <i>Gymnopus</i>         | <i>aquosus</i>           |
| 172 | JX913821.1 | <i>Ceratobasidium</i>   | <i>sp.</i>               |
| 173 | KC175298.1 | <i>Thanatephorus</i>    | <i>cucumeris</i>         |
| 174 | KC176296.1 | <i>Agrocybe</i>         | <i>smithii</i>           |
| 175 | KC346860.1 | <i>Ramaria</i>          | <i>rubella</i>           |
| 176 | KC414234.1 | <i>Panaeolus</i>        | <i>papilionaceus</i>     |
| 177 | KC514904.1 | <i>Jaapia</i>           | <i>argillacea</i>        |
| 178 | KC589127.1 | <i>Leiotrametes</i>     | <i>lactinea</i>          |
| 179 | KC848307.1 | <i>Trametes</i>         | <i>maxima</i>            |
| 180 | KF032528.1 | <i>Armillaria</i>       | <i>cepistipes</i>        |
| 181 | KF562020.1 | <i>Ceriporiopsis</i>    | <i>subvermispora</i>     |
| 182 | KF683347.1 | <i>Pisolithus</i>       | <i>microcarpus</i>       |
| 183 | KF774129.1 | <i>Marasmius</i>        | <i>minutus</i>           |
| 184 | KF830096.1 | <i>Pachylepyrium</i>    | <i>funariophilum</i>     |
| 185 | KJ395100.1 | <i>Omphalotus</i>       | <i>japonicus</i>         |
| 186 | KJ415103.1 | <i>Suillus</i>          | <i>pictus</i>            |
| 187 | KJ416236.1 | <i>Gymnopus</i>         | <i>aff.</i>              |
| 188 | KJ463733.1 | <i>Macrocybe</i>        | <i>gigantea</i>          |
| 189 | KJ643339.1 | <i>Armillaria</i>       | <i>mellea</i>            |
| 190 | KJ643344.1 | <i>Armillaria</i>       | <i>gallica</i>           |

|     |            |                        |                            |
|-----|------------|------------------------|----------------------------|
| 191 | KJ668449.1 | <i>Stereum</i>         | <i>hirsutum</i>            |
| 192 | KJ705189.1 | <i>Mycena</i>          | <i>adonis</i>              |
| 193 | KJ714007.1 | <i>Phanerochaete</i>   | <i>carnosa</i>             |
| 194 | KJ817287.1 | <i>Mycena</i>          | <i>sp.</i>                 |
| 195 | KJ831955.1 | <i>Trametopsis</i>     | <i>cf.</i>                 |
| 196 | KM229626.1 | <i>Ganoderma</i>       | <i>sp.</i>                 |
| 197 | KM248963.1 | <i>Suillus</i>         | <i>brevipes</i>            |
| 198 | KM975399.1 | <i>Gymnopus</i>        | <i>subsupinus</i>          |
| 199 | KM975434.1 | <i>Agrocybe</i>        | <i>putaminum</i>           |
| 200 | KP012741.1 | <i>Gymnopus</i>        | <i>gibbosus</i>            |
| 201 | KP780432.1 | <i>Pycnoporus</i>      | <i>coccineus</i>           |
| 202 | KP814148.1 | <i>Sistotremastrum</i> | <i>suecicum</i>            |
| 203 | KP814417.1 | <i>Xenasmatella</i>    | <i>vaga</i>                |
| 204 | KP814439.1 | <i>Xenasmatella</i>    | <i>aff.</i>                |
| 205 | KP826728.1 | <i>Omphalotus</i>      | <i>aff.</i>                |
| 206 | KR108009.1 | <i>Hexagonia</i>       | <i>nitida</i>              |
| 207 | KR150736.1 | <i>Gymnopilus</i>      | <i>purpureosquamulosus</i> |
| 208 | KR183787.1 | <i>Polyporus</i>       | <i>arcularius</i>          |
| 209 | KR350573.1 | <i>Phellinidium</i>    | <i>ferrugineofuscum</i>    |
| 210 | KR605824.1 | <i>Trametes</i>        | <i>polyzona</i>            |
| 211 | KR673571.1 | <i>Hymenopellis</i>    | <i>sp.</i>                 |
| 212 | KR673631.1 | <i>Mycena</i>          | <i>filopes</i>             |
| 213 | KR673632.1 | <i>Mycena</i>          | <i>crocata</i>             |
| 214 | KR673690.1 | <i>Leucogyrophana</i>  | <i>mollusca</i>            |
| 215 | KT207814.1 | <i>Piptoporus</i>      | <i>betulinus</i>           |
| 216 | KT210095.1 | <i>Trametes</i>        | <i>ljubarskyi</i>          |
| 217 | KT711021.1 | <i>Antrodia</i>        | <i>sinuosa</i>             |
| 218 | KT899356.1 | <i>Volvariella</i>     | <i>volvacea</i>            |
| 219 | KT900145.1 | <i>Mycena</i>          | <i>alexandri</i>           |
| 220 | KT933979.1 | <i>Russula</i>         | <i>dissimulans</i>         |
| 221 | KU163512.1 | <i>Paxillus</i>        | <i>adelphus</i>            |
| 222 | KU681426.1 | <i>Rhizoctonia</i>     | <i>solani</i>              |
| 223 | KU687403.1 | <i>Porodaedalea</i>    | <i>niemelaei</i>           |
| 224 | KU721495.1 | <i>Suillus</i>         | <i>decipiens</i>           |
| 225 | KU761244.1 | <i>Polyporus</i>       | <i>brumalis</i>            |
| 226 | KU863050.1 | <i>Panus</i>           | <i>rudis</i>               |
| 227 | KU885965.1 | <i>Armillaria</i>      | <i>sp.</i>                 |
| 228 | KU977342.1 | <i>Fungal</i>          | <i>sp.</i>                 |
| 229 | KX213704.1 | <i>Suillus</i>         | <i>brevipes</i>            |
| 230 | KX213755.1 | <i>Suillus</i>         | <i>americanus</i>          |
| 231 | KX213782.1 | <i>Suillus</i>         | <i>subaureus</i>           |
| 232 | KX358046.1 | <i>Russula</i>         | <i>compacta</i>            |
| 233 | KX388690.1 | <i>Hydnum</i>          | <i>rufescens</i>           |
| 234 | KX449464.1 | <i>Rickenella</i>      | <i>fibula</i>              |
| 235 | KX513842.1 | <i>Mycena</i>          | <i>epipterygia</i>         |
| 236 | KX513843.1 | <i>Mycena</i>          | <i>nivicola</i>            |
| 237 | KX553963.1 | <i>Hymenopellis</i>    | <i>radicata</i>            |
| 238 | KX611640.1 | <i>Peniophora</i>      | <i>sp.</i>                 |

|     |            |                           |                       |
|-----|------------|---------------------------|-----------------------|
| 239 | KX672001.1 | <i>Sparassis</i>          | <i>latifolia</i>      |
| 240 | KX688223.1 | <i>Hymenopellis</i>       | <i>furfuracea</i>     |
| 241 | KX688227.1 | <i>Hymenopellis</i>       | <i>orientalis</i>     |
| 242 | KX913225.1 | <i>Moniliophthora</i>     | <i>perniciosa</i>     |
| 243 | KY026633.1 | <i>Gymnopus</i>           | <i>foliophilus</i>    |
| 244 | KY026640.1 | <i>Gymnopus</i>           | <i>sp.</i>            |
| 245 | KY026644.1 | <i>Gymnopus</i>           | <i>sp.</i>            |
| 246 | KY026698.1 | <i>Collybia</i>           | <i>maculata</i>       |
| 247 | KY026714.1 | <i>Rhodocollybia</i>      | <i>butyracea</i>      |
| 248 | KY026723.1 | <i>Micromphale</i>        | <i>brevipes</i>       |
| 249 | KY026735.1 | <i>Gymnopus</i>           | <i>perforans</i>      |
| 250 | KY026740.1 | <i>Gymnopus</i>           | <i>sequoiae</i>       |
| 251 | KY026741.1 | <i>Gymnopus</i>           | <i>sequoiae</i>       |
| 252 | KY026752.1 | <i>Micromphale</i>        | <i>brevipes</i>       |
| 253 | KY061203.1 | <i>Gymnopus</i>           | <i>gibbosus</i>       |
| 254 | KY264043.1 | <i>Trametes</i>           | <i>cingulata</i>      |
| 255 | KY302695.1 | <i>Gymnopus</i>           | <i>sp.</i>            |
| 256 | KY389166.1 | <i>Armillaria</i>         | <i>sp.</i>            |
| 257 | KY433984.1 | <i>Neolentinus</i>        | <i>lepideus</i>       |
| 258 | KY509316.1 | <i>Serendipita</i>        | <i>sp.</i>            |
| 259 | KY548898.1 | <i>Laccaria</i>           | <i>sp.</i>            |
| 260 | KY688213.1 | <i>Trametes</i>           | <i>maxima</i>         |
| 261 | KY706177.1 | <i>Agrocybe</i>           | <i>cf.</i>            |
| 262 | KY774034.1 | <i>Clavulina</i>          | <i>sp.</i>            |
| 263 | KY848506.1 | <i>Gloeopeniophorella</i> | <i>convolvens</i>     |
| 264 | KY848508.1 | <i>Lactifluus</i>         | <i>subvellereus</i>   |
| 265 | KY848510.1 | <i>Multifurca</i>         | <i>ochricompacta</i>  |
| 266 | L54113.1   | <i>Suillus</i>            | <i>granulatus</i>     |
| 267 | LC029417.1 | <i>Macrocybe</i>          | <i>crassa</i>         |
| 268 | LC144835.1 | <i>Lepista</i>            | <i>nuda</i>           |
| 269 | LC327052.1 | <i>Scytinostroma</i>      | <i>sp.</i>            |
| 270 | LN714572.1 | <i>Mucidula</i>           | <i>mucida</i>         |
| 271 | LN808993.1 | <i>Bjerkandera</i>        | <i>adusta</i>         |
| 272 | MF077246.1 | <i>Earliella</i>          | <i>scabrosa</i>       |
| 273 | MF100973.1 | <i>Gymnopus</i>           | <i>irresolutus</i>    |
| 274 | MF153042.1 | <i>Tricholoma</i>         | <i>saponaceum</i>     |
| 275 | MF161241.1 | <i>Trametes</i>           | <i>gibbosa</i>        |
| 276 | MF161309.1 | <i>Punctularia</i>        | <i>strigosozonata</i> |
| 277 | MF377435.1 | <i>Trametes</i>           | <i>elegans</i>        |
| 278 | MF401956.1 | <i>Macrocybe</i>          | <i>titans</i>         |
| 279 | MF447832.1 | <i>Mutinus</i>            | <i>elegans</i>        |
| 280 | MF475935.1 | <i>Trametes</i>           | <i>versicolor</i>     |
| 281 | MF521899.1 | <i>Tricholoma</i>         | <i>matsutake</i>      |
| 282 | MF773590.1 | <i>Omphalotus</i>         | <i>illudens</i>       |
| 283 | MF943119.1 | <i>Mycena</i>             | <i>sp.</i>            |
| 284 | MF954821.1 | <i>Galerina</i>           | <i>marginata</i>      |
| 285 | MF955192.1 | <i>Mycena</i>             | <i>cf.</i>            |
| 286 | MF967587.1 | <i>Trametes</i>           | <i>pubescens</i>      |

|     |            |                        |                          |
|-----|------------|------------------------|--------------------------|
| 287 | MG066633.1 | <i>Heterobasidion</i>  | <i>annosum</i>           |
| 288 | MG383657.1 | <i>Agrocybe</i>        | <i>ochracea</i>          |
| 289 | MG407682.1 | <i>Russula</i>         | <i>brevipes</i>          |
| 290 | MG663240.1 | <i>Trametopsis</i>     | <i>cervina</i>           |
| 291 | MG819744.1 | <i>Pleurotus</i>       | <i>ostreatus</i>         |
| 292 | MG926691.1 | <i>Mycena</i>          | <i>sp.</i>               |
| 293 | MH013190.1 | <i>Auriculariopsis</i> | <i>ampla</i>             |
| 294 | MH136828.1 | <i>Mycena</i>          | <i>sp.</i>               |
| 295 | MH211691.1 | <i>Lentinula</i>       | <i>raphanica</i>         |
| 296 | MH211861.1 | <i>Gymnopus</i>        | <i>luxurians</i>         |
| 297 | MH211882.1 | <i>Omphalotus</i>      | <i>subilludens</i>       |
| 298 | MH236069.1 | <i>Suillus</i>         | <i>hirtellus</i>         |
| 299 | MH248774.1 | <i>Heliocybe</i>       | <i>sulcata</i>           |
| 300 | MH259876.1 | <i>Gymnopus</i>        | <i>inusitatus</i>        |
| 301 | MH320560.1 | <i>Fomes</i>           | <i>fomentarius</i>       |
| 302 | MH327724.1 | <i>Calocybe</i>        | <i>indica</i>            |
| 303 | MH489076.1 | <i>Agrocybe</i>        | <i>pediades</i>          |
| 304 | MH551484.1 | <i>Pisolithus</i>      | <i>tinctorius</i>        |
| 305 | MH633971.1 | <i>Serendipita</i>     | <i>vermifera</i>         |
| 306 | MH855556.1 | <i>Panellus</i>        | <i>stipticus</i>         |
| 307 | MH855588.1 | <i>Cystostereum</i>    | <i>murrayi</i>           |
| 308 | MH856158.1 | <i>Mycena</i>          | <i>galopus</i>           |
| 309 | MH856205.1 | <i>Pholiota</i>        | <i>conissans</i>         |
| 310 | MH856262.1 | <i>Coprinopsis</i>     | <i>marcescibilis</i>     |
| 311 | MH856332.1 | <i>Mycena</i>          | <i>capillaripes</i>      |
| 312 | MH856339.1 | <i>Mycena</i>          | <i>zephyrus</i>          |
| 313 | MH856657.1 | <i>Mycena</i>          | <i>aurantiomarginata</i> |
| 314 | MH856660.1 | <i>Mycena</i>          | <i>floridula</i>         |
| 315 | MH856662.1 | <i>Mycena</i>          | <i>sanguinolenta</i>     |
| 316 | MH856663.1 | <i>Mycena</i>          | <i>xantholeuca</i>       |
| 317 | MH856674.1 | <i>Oudemansiella</i>   | <i>platensis</i>         |
| 318 | MH856811.1 | <i>Coprinellus</i>     | <i>pellucidus</i>        |
| 319 | MH857173.1 | <i>Gymnopus</i>        | <i>androsaceus</i>       |
| 320 | MH857185.1 | <i>Mycena</i>          | <i>flavoalba</i>         |
| 321 | MH857381.1 | <i>Sistotremastrum</i> | <i>niveocremeum</i>      |
| 322 | MH857800.1 | <i>Pterula</i>         | <i>gracilis</i>          |
| 323 | MH861422.1 | <i>Vararia</i>         | <i>minispora</i>         |
| 324 | MH861655.1 | <i>Schizophyllum</i>   | <i>commune</i>           |
| 325 | MH862107.1 | <i>Rickenella</i>      | <i>mellea</i>            |
| 326 | MH862523.1 | <i>Vuilleminia</i>     | <i>alni</i>              |
| 327 | MH863568.1 | <i>Serendipita</i>     | <i>indica</i>            |
| 328 | MH910584.1 | <i>Fistulina</i>       | <i>hepatica</i>          |
| 329 | MK020098.1 | <i>Tricholoma</i>      | <i>sp.</i>               |
| 330 | MK024240.1 | <i>Macrocybe</i>       | <i>gigantea</i>          |
| 331 | NR119582.1 | <i>Gymnopus</i>        | <i>junquilleus</i>       |
| 332 | NR119827.1 | <i>Punctulariopsis</i> | <i>subglobispora</i>     |
| 333 | NR120152.1 | <i>Auricularia</i>     | <i>subglabra</i>         |
| 334 | NR137863.1 | <i>Gymnopus</i>        | <i>pseudoluxurians</i>   |

|     |             |                  |                         |
|-----|-------------|------------------|-------------------------|
| 335 | NR152884.1  | <i>Gymnopus</i>  | <i>trogoides</i>        |
| 336 | NR152898.1  | <i>Gymnopus</i>  | <i>cremeostipitatus</i> |
| 337 | NR154169.1  | <i>Mycena</i>    | <i>sinar</i>            |
| 338 | NR154170.1  | <i>Mycena</i>    | <i>seminau</i>          |
| 339 | tig00000186 | <i>len159946</i> |                         |
| 340 | tig00000223 | <i>len779039</i> |                         |
| 341 | tig00008634 | <i>len60644</i>  |                         |
| 342 | tig00008640 | <i>len23955</i>  |                         |

---
