# Supplementary figures and images for: [Retracted] Genome Assembly and Analyses of the Macrofungus Macrocybe gigantea
Source: Hindawi journal article supplement (doi:10.1155/2021/6656365), 2021-01-01

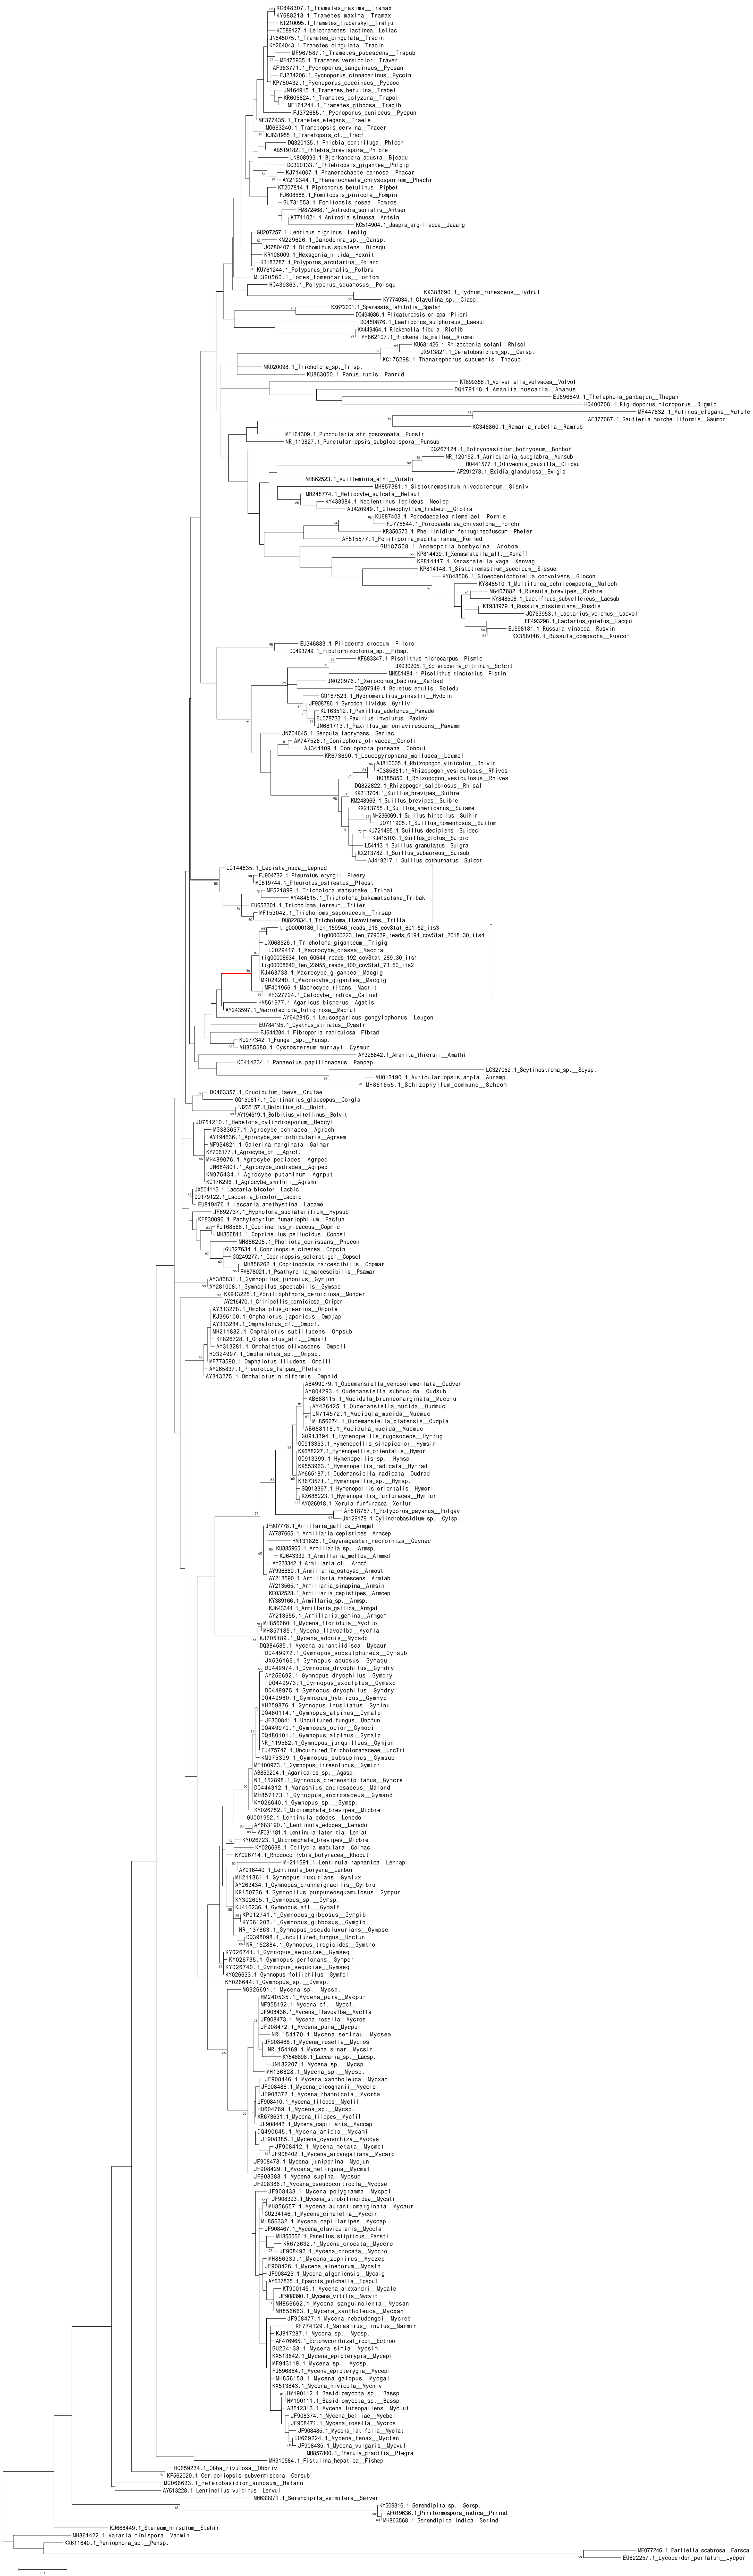

Supplement: f1 [file 6656365.f1.pdf]
